# Supplementary material for: Biparatopic sybodies neutralize SARS‐CoV‐2 variants of concern and mitigate drug resistance
Source: PubMed Central journal article supplement (PMC8982573; doi:10.15252/embr.202154199), 2022-03-07
Supplement: EMBR-23-e54199-s002.pdf [file EMBR-23-e54199-s002.pdf]

# Supplementary Material

## Table of content

Appendix Tables S1 and S2, Pages 2-4

Appendix Figures S1-S4, Pages 5-8

### Appendix Table S1 – Sybody protein sequences

|              |                                                                                                                                   |
|--------------|-----------------------------------------------------------------------------------------------------------------------------------|
| <b>Sb#14</b> | QVQLVESGGGLVQAGGSLRLSCAASGFPVQAREMEWYRQAPGKEREWVAAIKSTGTYTAYAYSVK<br>GRFTISRDNAKNTVYVYLMNSLKPEDTAVYYCYVYVVGSSYIGQGTQVTVS          |
| <b>Sb#15</b> | QVQLVESGGGLVQAGGSLRLSCAASGFPVKNFEMEYRQAPGKEREWVAAIQSGGVETYYADSVK<br>GRFTISRDNAKNTVYVYLMNSLKPEDTAVYYCFVYVGRSYIGQGTQVTVS            |
| <b>Sb#16</b> | QVQLVESGGGLVQAGGSLRLSCAASGFPVAYKTMWWYRQAPGKEREWVAAIESYGIKWTRYADSV<br>KGRFTISRDNAKNTVYVYLMNSLKPEDTAVYYCIVWVGAQYHGQGTQVTVS          |
| <b>Sb#42</b> | QVQLVESGGGLVQAGGSLRLSCAASGFPVYWHHMHWYRQAPGKEREWVAAIISWGWYTTYADSVK<br>GRFTISRDNAKNTVYVYLMNSLKPEDTAVYYCNVKDHGAQNQMYDYWGQGTQVTVS     |
| <b>Sb#45</b> | QVQLVESGGGLVQAGGSLRLSCAASGFPVYRDRMAWYRQAPGKEREWVAAIYSAGQQTRYADSVK<br>GRFTISRDNAKNTVYVYLMNSLKPEDTAVYYCNVKDVGHHEYYDYWGQGTQVTVS      |
| <b>Sb#68</b> | QVQLVESGGGSVQAGGSLRLSCAASGSISSITYLGWFRQAPGKEREGVAALITVNGHTYYADSVK<br>GRFTVSLDNAKNTVYVYLMNSLKPEDTALYYCAAAAWGYAWPLHQDDYWYWGQGTQVTVS |

**Appendix Table S2 – Cryo-EM data collection, refinement and validation statistics**

|                                                     | S-2P + Sb#15 + Sb#68                   |                                                               | S-2P + Sb#15                                              | S-6P + Sb#68                                     |                                              |
|-----------------------------------------------------|----------------------------------------|---------------------------------------------------------------|-----------------------------------------------------------|--------------------------------------------------|----------------------------------------------|
|                                                     | <i>3up</i><br>(EMD-12082,<br>PDB 7P77) | <i>1up/1up-<br/>out/1down</i><br>(EMD-<br>12083, PDB<br>7P78) | <i>1up/1up-<br/>out/1down</i><br>(EMD-12084, PDB<br>7P79) | <i>2up/1flexible</i><br>(EMD-12085,<br>PDB 7P7A) | <i>1up/2down</i><br>(EMD-12086,<br>PDB 7P7B) |
| <b>Data collection and processing</b>               |                                        |                                                               |                                                           |                                                  |                                              |
| Magnification                                       | 49,407                                 | 49,407                                                        | 49,407                                                    | 49,407                                           | 49,407                                       |
| Voltage (kV)                                        | 200                                    | 200                                                           | 200                                                       | 200                                              | 200                                          |
| Electron exposure (e <sup>-</sup> /Å <sup>2</sup> ) | 53                                     | 53                                                            | 53                                                        | 53                                               | 53                                           |
| Defocus range (μm)                                  | -0.9 to -1.9                           | -0.9 to -1.9                                                  | -0.9 to -1.9                                              | -0.9 to -1.9                                     | -0.9 to -1.9                                 |
| Pixel size (Å)                                      | 1.012                                  | 1.012                                                         | 1.012                                                     | 1.012                                            | 1.012                                        |
| Symmetry imposed                                    | C3                                     | C1                                                            | C1                                                        | C1                                               | C1                                           |
| Initial particle images (no.)                       | 637,105                                | 637,105                                                       | 66,632                                                    | 344,976                                          | 344,976                                      |
| Final particle images (no.)                         | 78,933                                 | 52,839                                                        | 22,055                                                    | 24,325                                           | 84,917                                       |
| Map resolution (Å)                                  | 2.98                                   | 3.32                                                          | 4.04                                                      | 4.76                                             | 3.13                                         |
| FSC threshold                                       | 0.143                                  |                                                               |                                                           |                                                  |                                              |
| Map resolution range (Å)                            | 2.5 – 8.5                              | 2.8 – 10.6                                                    | 3.7-16.6                                                  | 4.4-23.5                                         | 2.7-9.8                                      |
| <b>Refinement</b>                                   |                                        |                                                               |                                                           |                                                  |                                              |
| Initial model used                                  | PDB 7MY2                               | PDB 7MY2                                                      | PDB 7MY2                                                  | PDB 7MY2                                         | PDB 6ZGG                                     |
| Model resolution (Å)<br>(0.5 FSC threshold)         | 3.0                                    | 3.3                                                           | 4.0                                                       | 4.8                                              | 3.1                                          |
| Model resolution range (Å)                          | 15-3.0                                 | 15-3.3                                                        | 17-4.0                                                    | 24-4.8                                           | 15-3.1                                       |
| Map sharpening B factor (Å <sup>2</sup> )           | -99                                    | -82.7                                                         | -80.4                                                     | -118.3                                           | -92.2                                        |
| Model composition                                   |                                        |                                                               |                                                           |                                                  |                                              |
| Nonhydrogen atoms                                   | 30582                                  | 28807                                                         | 26907                                                     | 25421                                            | 25096                                        |

|                                    |        |        |        |        |        |
|------------------------------------|--------|--------|--------|--------|--------|
| Protein residues                   | 3822   | 3625   | 3377   | 3159   | 3207   |
| Ligands                            | 66     | 56     | 56     | 65     | 0      |
| <i>B</i> factors (Å <sup>2</sup> ) |        |        |        |        |        |
| Protein                            | 129.92 | 220.07 | 121.98 | 195.00 | 185.59 |
| Ligand                             | 114.69 | 157.41 | 138.65 | 217.68 | -      |
| R.m.s. deviations                  |        |        |        |        |        |
| Bond lengths                       | 0.006  | 0.006  | 0.007  | 0.007  | 0.006  |
| Bond angles (°)                    | 1.059  | 1.078  | 1.220  | 1.190  | 1.005  |
| Validation                         |        |        |        |        |        |
| MolProbity                         | 1.47   | 1.54   | 1.59   | 1.59   | 1.43   |
| score                              |        |        |        |        |        |
| Clashscore                         | 3.61   | 4.39   | 4.23   | 4.71   | 3.07   |
| Poor rotamers                      | 0.00   | 0.00   | 0.00   | 0.00   | 0.04   |
| (%)                                |        |        |        |        |        |
| Ramachandran                       |        |        |        |        |        |
| plot                               |        |        |        |        |        |
| Favored (%)                        | 95.46  | 95.39  | 94.39  | 95.09  | 95.24  |
| Allowed (%)                        | 4.54   | 4.58   | 5.61   | 4.95   | 4.73   |
| Disallowed (%)                     | 0.00   | 0.03   | 0.00   | 0.00   | 0.03   |

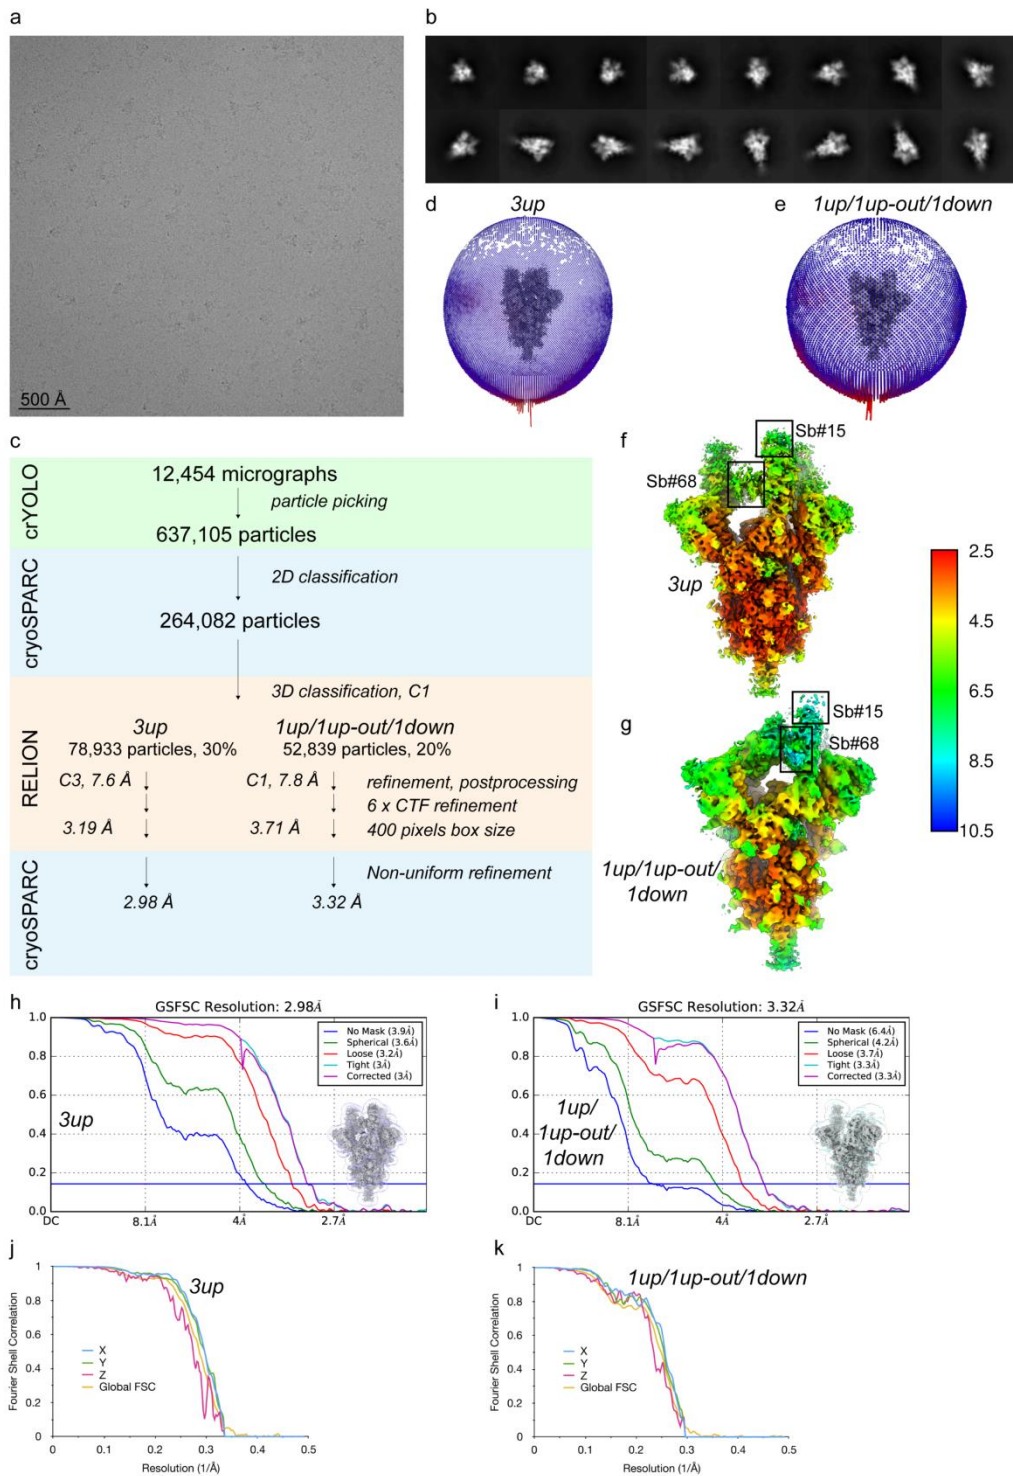

## Appendix Figure S1

**Cryo-EM reconstruction of S-2P in complex with Sb#15 and Sb#68.** Representative cryo-EM image (A) and 2D-class averages (B) of vitrified S-2P in the presence of both Sb#15 and Sb#68. (C) Image processing work flow. Angular particle distribution plot (D and E), final reconstructed map colored by local resolution, as estimated in cryoSPARC (F and G), FSC plot (H and I) and anisotropy plot used for resolution estimation (J and K) for the final 3up and 1up/1up-out/1down RBD reconstruction, respectively. (H and I) The line indicates the FSC thresholds used for FSC of 0.143, and the mask used for FSC calculation overlaid on the map is shown as thumbnail. (J and K) The global FSC curve is represented in yellow, while the directional FSCs along the x, y and z axis are displayed in blue, green and red, respectively.

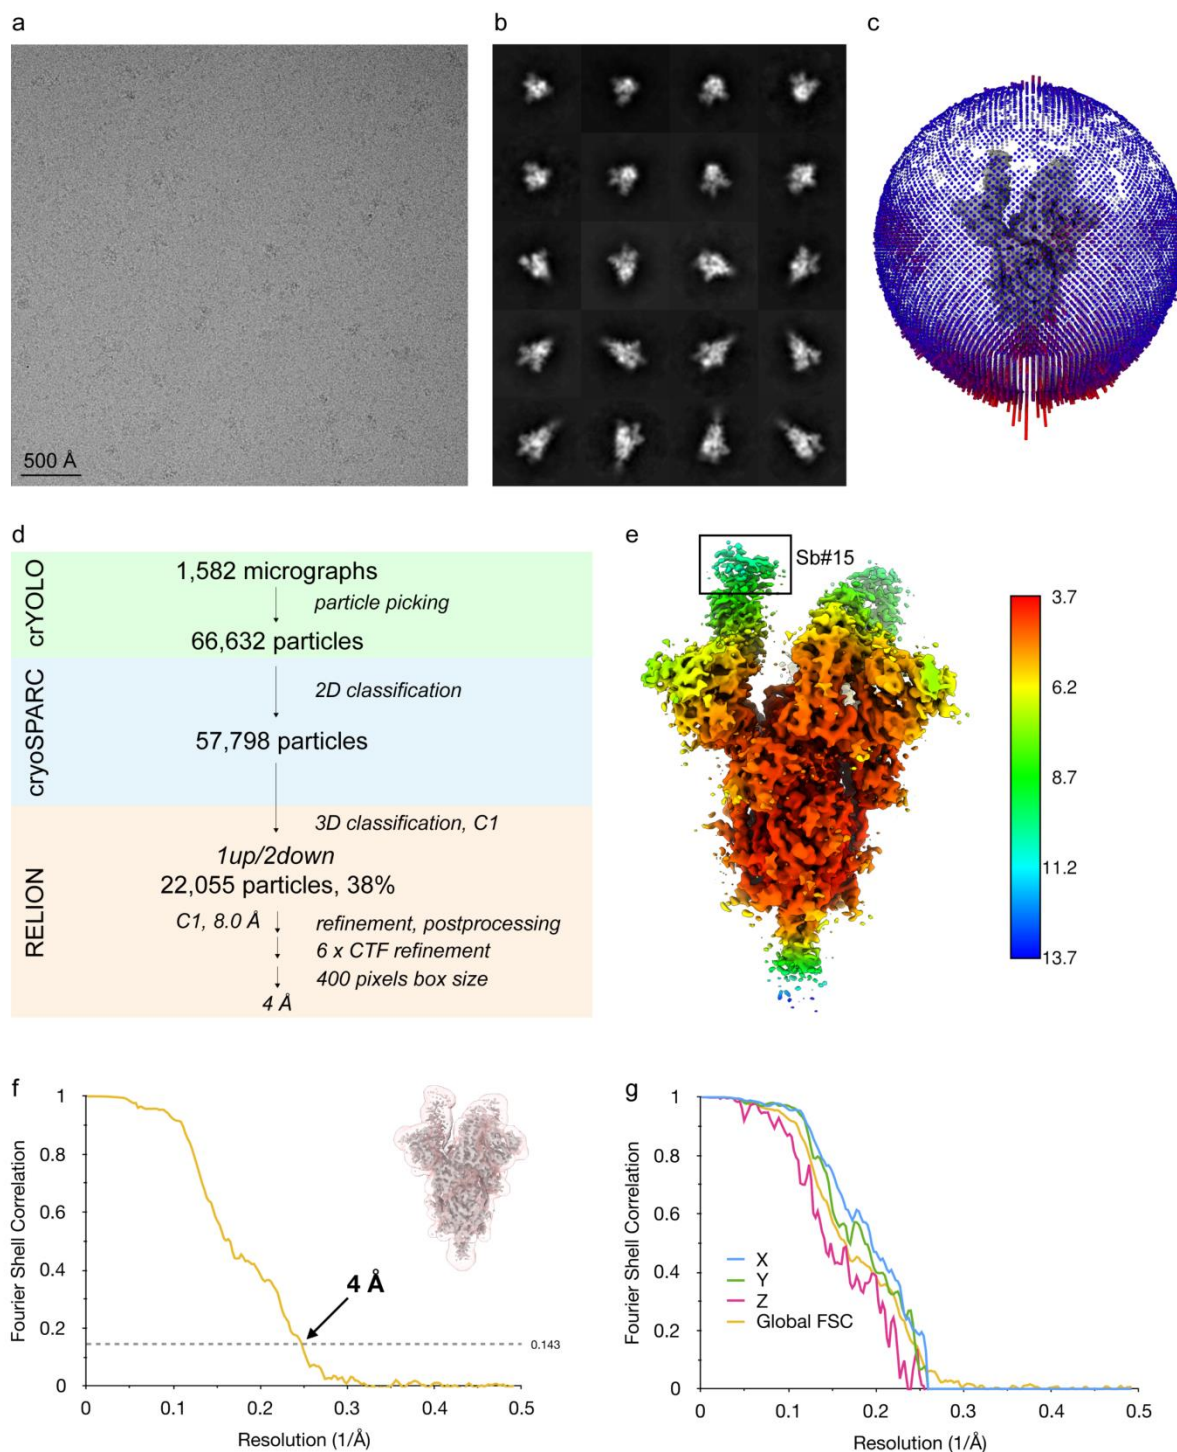

## Appendix Figure S2

**Cryo-EM reconstruction of S-2P in presence of Sb#15.** Representative cryo-EM image (A) and 2D-class averages (B) of vitrified S-2P in the presence of Sb#15. (C) Angular distribution plot of particles included in the final map. (D) Image processing workflow. Final reconstructed map colored by local resolution, as estimated in RELION (E), FSC plot (F) and anisotropy plot used for resolution estimation (G) for the final *1up/2down* RBD reconstruction. (F) The line indicates the FSC thresholds used for FSC of 0.143, and the mask used for FSC calculation overlaid on the map is shown as thumbnail. (G) The global FSC curve is represented in yellow, while the directional FSCs along the x, y and z axis are displayed in blue, green and red, respectively.



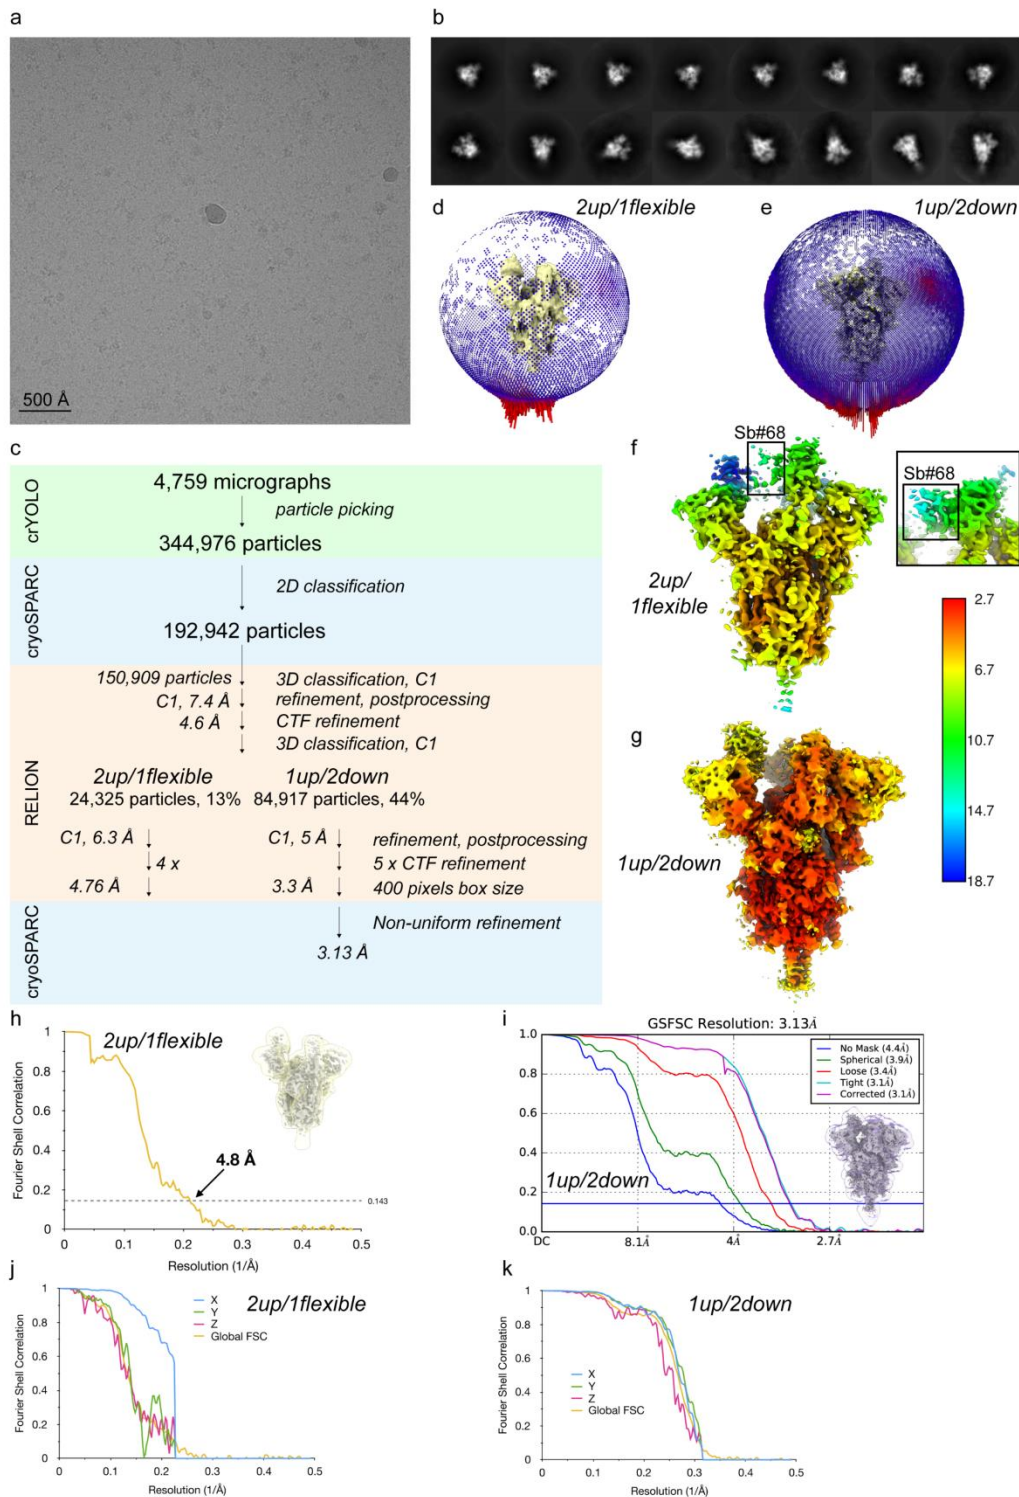

### Appendix Figure S3

**Cryo-EM reconstruction of S-6P in presence of Sb#68.** Representative cryo-EM image (A) and 2D-class averages (B) of vitrified S-6P in the presence of Sb#68. (C) Image processing work flow. Angular particle distribution plot (D and E), final reconstructed map colored by local resolution, as estimated in cryoSPARC and RELION (F and G), FSC plot (H and I) and anisotropy plot used for resolution estimation (J and K) for the final *2up/1flexible* and *1up/2down* RBD reconstruction, respectively. (H and I) The line indicates the FSC thresholds used for FSC of 0.143, and the mask used for FSC calculation overlaid on the map is shown as thumbnail. (J and K) The global FSC curve is represented in yellow, while the directional FSCs along the x, y and z axis are displayed in blue, green and red, respectively.

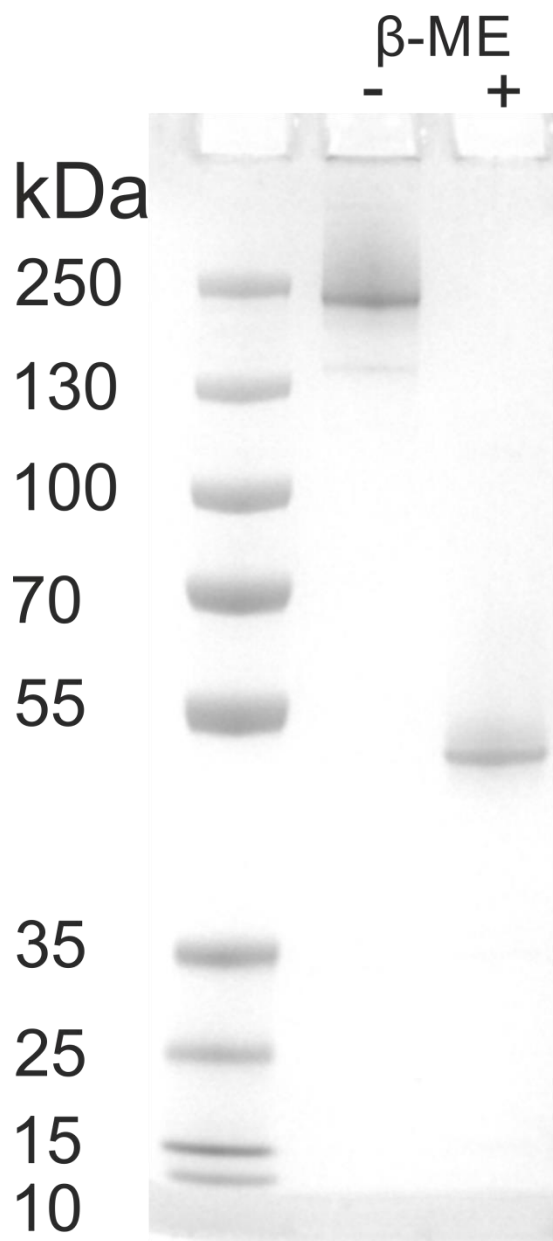

**Appendix Figure S4**

**SDS-PAGE analysis of Tripod-GS4r.** Purified Tripod-GS4r was loaded on a SDS-PAGE gel with and without incubation of  $\beta$ -mercaptoethanol ( $\beta$ -ME) and stained using coomassie blue.
